# Supplementary material for: Neutralization of N501Y mutant SARS-CoV-2 by BNT162b2 vaccine-elicited sera
Source: PubMed Central journal article supplement (PMC7814835; doi:10.21203/rs.3.rs-143532/v1), 2021-01-13
Supplement: 3c1941e1a3c5b5c9576e4eb3.pdf [file 3c1941e1a3c5b5c9576e4eb3.pdf]

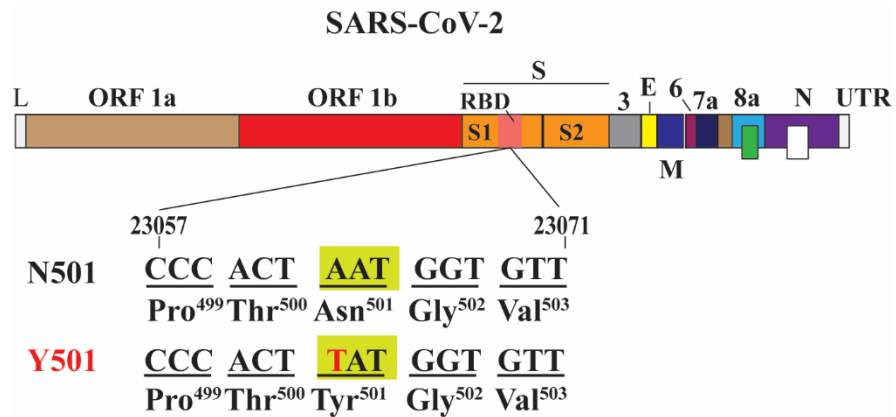

**Supplementary Figure 1.** Diagram of the N501Y substitution. L – leader sequence; ORF – open reading frame; RBD – receptor binding domain; S – spike glycoprotein; S1 – N-terminal furin cleavage fragment of S; S2 – C-terminal furin cleavage fragment of S; E – envelope protein; M – membrane protein; N – nucleoprotein; UTR – untranslated region.

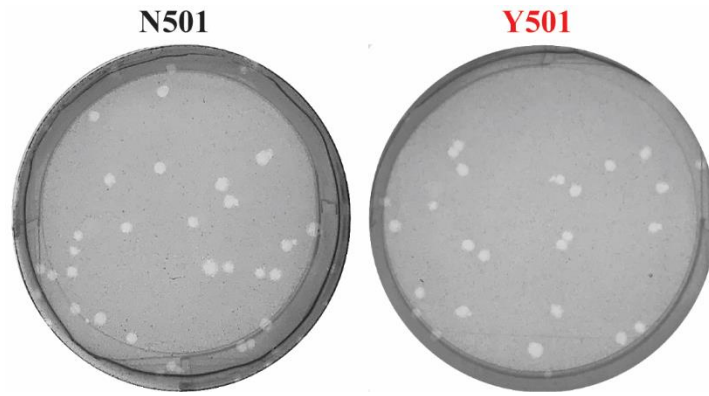

**Supplementary Figure 2.** Plaque morphologies of N501 and Y501 SARS-CoV-2 on Vero E6 cells.

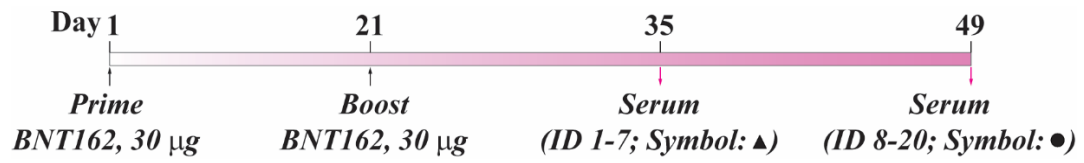

**Supplementary Figure 3.** Scheme of the BNT162 vaccination and serum sampling.

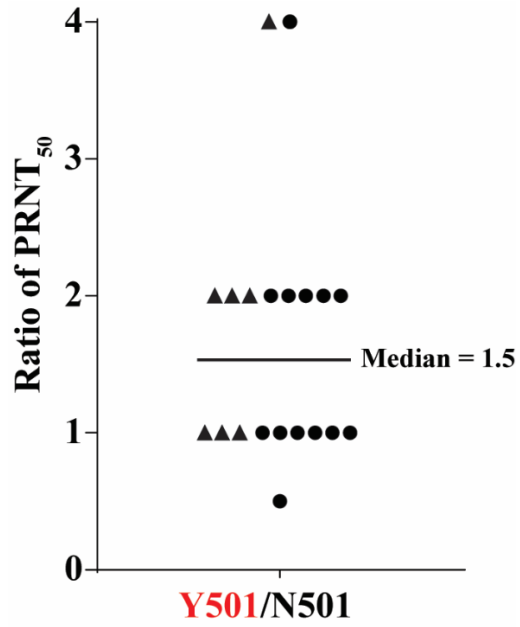

**Supplementary Figure 4.** Plot of the ratio of PRNT<sub>50</sub> between Y501 and N501 viruses. Triangles represent sera drawn two weeks after the second dose; circles represent sera drawn four weeks after the second dose.

**Supplementary Table 1.** PRNT<sub>50</sub> values of 20 BNT162b2 post-immunization sera against N501 and Y501 SARS-CoV-2.

| Serum ID | PRNT <sub>50</sub> |      | PRNT <sub>50</sub> ratio<br>(Y501/N501) |
|----------|--------------------|------|-----------------------------------------|
|          | N501               | Y501 |                                         |
| 1        | 160                | 640  | 4                                       |
| 2        | 160                | 320  | 2                                       |
| 3        | 320                | 640  | 2                                       |
| 4        | 80                 | 160  | 2                                       |
| 5        | 160                | 160  | 1                                       |
| 6        | 320                | 320  | 1                                       |
| 7        | 640                | 640  | 1                                       |
| 8        | 160                | 160  | 1                                       |
| 9        | 640                | 640  | 1                                       |
| 10       | 640                | 1280 | 2                                       |
| 11       | 160                | 640  | 4                                       |
| 12       | 320                | 320  | 1                                       |
| 13       | 640                | 1280 | 2                                       |
| 14       | 640                | 320  | 0.5                                     |
| 15       | 320                | 640  | 2                                       |
| 16       | 320                | 640  | 2                                       |
| 17       | 640                | 640  | 1                                       |
| 18       | 640                | 1280 | 2                                       |
| 19       | 640                | 640  | 1                                       |
| 20       | 640                | 640  | 1                                       |
